# Supplementary material for: Three lessons on diabetes for global health professionals, researchers and policy-makers from the people of Ga Mashie
Source: Frontiers journal article supplement (doi:10.3389/fnut.2025.1534450), 2025-03-14
Supplement: Table_2.pdf [file Table_2.pdf]

**Supplementary Table 2. COREQ (COnsolidated criteria for REporting Qualitative research) Checklist**

| Topic                                    | Item No. | Guide Questions/Description                                                                                                                              | Reported on Page No.               |
|------------------------------------------|----------|----------------------------------------------------------------------------------------------------------------------------------------------------------|------------------------------------|
| Domain 1: Research team and reflexivity  |          |                                                                                                                                                          |                                    |
| Personal characteristics                 |          |                                                                                                                                                          |                                    |
| Interviewer/facilitator                  | 1        | Which author/s conducted the interview or focus group?                                                                                                   | Reflexivity                        |
| Credentials                              | 2        | What were the researcher's credentials? E.g. PhD, MD                                                                                                     | Reflexivity                        |
| Occupation                               | 3        | What was their occupation at the time of the study?                                                                                                      | Reflexivity                        |
| Gender                                   | 4        | Was the researcher male or female?                                                                                                                       | Reflexivity                        |
| Experience and training                  | 5        | What experience or training did the researcher have?                                                                                                     | Reflexivity                        |
| Relationship with participants           |          |                                                                                                                                                          |                                    |
| Relationship established                 | 6        | Was a relationship established prior to study commencement?                                                                                              | Reflexivity                        |
| Participant knowledge of the interviewer | 7        | What did the participants know about the researcher? e.g. personal goals, reasons for doing the research                                                 |                                    |
|                                          |          |                                                                                                                                                          | Reflexivity                        |
|                                          |          |                                                                                                                                                          |                                    |
| Interviewer characteristics              | 8        | What characteristics were reported about the interviewer/facilitator? e.g. Bias, assumptions, reasons and interests in the research topic                |                                    |
|                                          |          |                                                                                                                                                          | Reflexivity                        |
|                                          |          |                                                                                                                                                          |                                    |
| Domain 2: Study design                   |          |                                                                                                                                                          |                                    |
| Theoretical framework                    |          |                                                                                                                                                          |                                    |
| Methodological orientation and Theory    | 9        | What methodological orientation was stated to underpin the study? e.g. grounded theory, discourse analysis, ethnography, phenomenology, content analysis |                                    |
|                                          |          |                                                                                                                                                          | Data collection                    |
|                                          |          |                                                                                                                                                          |                                    |
| Participant selection                    |          |                                                                                                                                                          |                                    |
| Sampling                                 | 10       | How were participants selected? e.g. purposive, convenience, consecutive, snowball                                                                       |                                    |
|                                          |          |                                                                                                                                                          | Sampling procedure and sample size |
|                                          |          |                                                                                                                                                          |                                    |
| Method of approach                       | 11       | How were participants approached? e.g. face-to-face, telephone, mail, email                                                                              |                                    |
|                                          |          |                                                                                                                                                          | Sampling procedure and sample size |
|                                          |          |                                                                                                                                                          |                                    |
| Sample size                              | 12       | How many participants were in the study?                                                                                                                 | Sampling procedure and sample size |
| Non-participation                        | 13       | How many people refused to participate or dropped out? Reasons?                                                                                          | Sampling procedure and sample size |
| Setting                                  |          |                                                                                                                                                          |                                    |
| Setting of data collection               | 14       | Where was the data collected? e.g. home, clinic, workplace                                                                                               | Sampling procedure and sample      |

|                                        |                 |                                                                                                                                    |                                    |
|----------------------------------------|-----------------|------------------------------------------------------------------------------------------------------------------------------------|------------------------------------|
|                                        |                 |                                                                                                                                    | size                               |
| Presence of non-participants           | 15              | Was anyone else present besides the participants and researchers?                                                                  | Data collection                    |
| Description of sample                  | 16              | What are the important characteristics of the sample? e.g. demographic data, date                                                  | Participant characteristics        |
| <i>Data collection</i>                 |                 |                                                                                                                                    |                                    |
| Interview guide                        | 17              | Were questions, prompts, guides provided by the authors? Was it pilot tested?                                                      | Data collection                    |
| Repeat interviews                      | 18              | Were repeat interviews carried out? If yes, how many?                                                                              | Data collection                    |
| Audio/visual recording                 | 19              | Did the research use audio or visual recording to collect the data?                                                                | Data analysis                      |
| Field notes                            | 20              | Were field notes made during and/or after the interview or focus group?                                                            | Data collection                    |
| Duration                               | 21              | What was the duration of the interviews or focus group?                                                                            | Data collection                    |
| Data saturation                        | 22              | Was data saturation discussed?                                                                                                     | Sampling procedure and sample size |
| Transcripts returned                   | 23              | Were transcripts returned to participants for comment and/or                                                                       | Data collection                    |
| <b>Topic</b>                           | <b>Item No.</b> | <b>Guide Questions/Description</b>                                                                                                 | <b>Reported on Page No.</b>        |
|                                        |                 | correction?                                                                                                                        |                                    |
| <b>Domain 3: analysis and findings</b> |                 |                                                                                                                                    |                                    |
| <i>Data analysis</i>                   |                 |                                                                                                                                    |                                    |
| Number of data coders                  | 24              | How many data coders coded the data?                                                                                               | Data analysis                      |
| Description of the coding tree         | 25              | Did authors provide a description of the coding tree?                                                                              | Data analysis                      |
| Derivation of themes                   | 26              | Were themes identified in advance or derived from the data?                                                                        | Data analysis                      |
| Software                               | 27              | What software, if applicable, was used to manage the data?                                                                         | Data analysis                      |
| Participant checking                   | 28              | Did participants provide feedback on the findings?                                                                                 | Data collection                    |
| <i>Reporting</i>                       |                 |                                                                                                                                    |                                    |
| Quotations presented                   | 29              | Were participant quotations presented to illustrate the themes/findings?<br>Was each quotation identified? e.g. participant number | Results                            |
| Data and findings consistent           | 30              | Was there consistency between the data presented and the findings?                                                                 | Results, Discussion                |
| Clarity of major themes                | 31              | Were major themes clearly presented in the findings?                                                                               | Results                            |
| Clarity of minor themes                | 32              | Is there a description of diverse cases or discussion of minor themes?                                                             | Results, Discussion                |

Developed from: Tong A, Sainsbury P, Craig J. Consolidated criteria for reporting qualitative research (COREQ): a 32-item checklist for interviews and focus groups. *International Journal for Quality in Health Care*. 2007. Volume 19, Number 6: pp. 349 – 357
